# Supplementary material for: Urinary Metals Concentrations and Biomarkers of Autoimmunity among Navajo and Nicaraguan Men
Source: PubMed Central journal article supplement (PMC7432079; doi:10.3390/ijerph17155263), 2020-07-22
Supplement: ijerph-17-05263-s001.pdf [file ijerph-17-05263-s001.pdf]

| Limits of Detection (LODs)                                      |                         | Navajo & Nicaraguan* | NHANES 11-12* |
|-----------------------------------------------------------------|-------------------------|----------------------|---------------|
| UAS3                                                            | Arsenous (III) Acid     | 0.12                 | 0.48          |
| UAS5                                                            | Arsenic (V) Acid        | 0.79                 | 0.87          |
| UASB                                                            | Arsenobetaine           | 1.16                 | 1.19          |
| UASC                                                            | Arsenocholine           | 0.11                 | 0.28          |
| UDMA                                                            | Dimethylarsinic Acid    | 1.91                 | 1.8           |
| UMMA                                                            | Monomethyl arsonic Acid | 0.2                  | 0.89          |
| UTMO                                                            | Trimethylarsine oxide   | 0.17                 | 0.25          |
| UUR                                                             | Uranium                 | 0.002                | 0.003         |
| UTU                                                             | Tungsten                | 0.018                | 0.026         |
| UTL                                                             | Thallium                | 0.018                | 0.02          |
| USR                                                             | Storntium               | 2.34                 | 2.5           |
| USN                                                             | Tin                     | 0.09                 | 0.22          |
| USB                                                             | Antimony                | 0.022                | 0.41          |
| UPB                                                             | Lead                    | 0.03                 | 0.08          |
| UMO                                                             | Molybdenum              | 0.8                  | 0.99          |
| UMN                                                             | Manganese               | 0.13                 | 0.08          |
| UCS                                                             | Cesium                  | 0.086                | 0.12          |
| UCO                                                             | Cobalt                  | 0.023                | 0.48          |
| UCD                                                             | Cadmium                 | 0.036                | 0.056         |
| UBA                                                             | Barium                  | 0.06                 | 0.1           |
| *Sent with laboratory results by CDC<br>+Published by CDC [59]. |                         |                      |               |

**Supplementary Table 1. Limits of Detection**
